# Supplementary material for: A novel steric effect-regulated isothermal exponential amplification technology for the one-step homogeneous sensing of proteins
Source: Royal Society of Chemistry journal article supplement (doi:10.1039/c7an01963g), 2018-01-01
Supplement: c7an01963g1.pdf [file c7an01963g1.pdf]

## **A novel steric effect-regulated isothermal exponential amplification technology for one-step homogeneous sensing of proteins**

Wanghua Wu<sup>a</sup>, Wufan Pan<sup>b</sup>, Dongdong Yu<sup>c</sup>, Zhen Yuan<sup>a</sup>, Yazhou Qin<sup>b</sup>, Yuxiang Lu<sup>b</sup>, Tao Zhang<sup>\*a</sup> and Jianguang Zhou<sup>\*a</sup>

<sup>a</sup>Research Center for Analytical Instrumentation, Institute of Cyber-Systems and Control, State Key Laboratory of Industrial Control Technology, Zhejiang University, Hangzhou, 310027, P.R. China

<sup>b</sup>Department of Chemistry, Zhejiang University, Hangzhou, 310027, P.R. China

<sup>c</sup>Hospital of Zhejiang University, Zhejiang University, Hangzhou, 310027, P.R. China

\*corresponding authors: zhtao@zju.edu.cn, jgzhou@zju.edu.cn

## Experimental

**Materials.** All oligonucleotides of HPLC purity were synthesized from Sangon Biotech Co., Ltd. (Shanghai, China). Sequences of these oligonucleotides are listed in Table S1. Bst 2.0 WarmStart DNA polymerase (8000 units mL<sup>-1</sup>), Nt.BstNBI nicking endonuclease (10000 units mL<sup>-1</sup>), deoxyribonucleotide triphosphates (dNTPs, 10 mM) and 10× NEBuffer 3.1 were purchased from New England Biolabs (Ipswich, MA). Anti-Digoxin mouse monoclonal antibody (IgG, 0.5 mg mL<sup>-1</sup>) was purchased from GeneTex, Inc. (Irvine, CA, USA). Avidin from egg white (Bio-Ultra), Elastase from porcine pancreas and human thrombin were purchased from Sigma Aldrich (St. Louis, MO, USA). SYBR Green I (10,000×) was purchased from Invitrogen Life Technologies (Carlsbad, CA, USA). DNA-grade water (DNase- and Protease-free) was purchased from Fisher Scientific (Pittsburgh, PA, USA). The clinical serum samples of healthy person were obtained from the Hospital of Zhejiang University. All solutions were freshly prepared with DNA-grade water.

**General Procedure of SER-EXPAR.** First, a stock solution of 20 nM EBH, 50 nM EXPAR template, 2 U Nt.BstNBI, 0.8 U Bst 2.0 WarmStart DNA polymerase, 0.4 mM dNTPs, 0.5× SYBR Green I, 1× NEBuffer 3.1 (100 mM NaCl, 50 mM Tris-HCl, 10 mM MgCl<sub>2</sub>, 100 µg/ml BSA) and water was freshly prepared on ice. The final reaction mixture was obtained by distributing 22.5 µL stock solution and 2.5 µL target protein of varying concentrations into 8-strip PCR tubes. After vortexing and centrifugation, these PCR tubes were immediately transferred onto a Bio-rad CFX-96 real-time PCR system and incubated at 55 °C. The fluorescence of SYBR Green I was measured at 1 min intervals.

**Gel Electrophoresis.** In order to demonstrate the feasibility of SER-EXPAR, 15% non-denaturing polyacrylamide gel electrophoresis (PAGE) was used to characterize the interactions among avidin, Nt.BstNBI and biotin-labeled EBH. Specifically, a solution containing 1 µM EBH<sub>6</sub> and 1 µM Nt.BstNBI or 1 µM target protein (or both) in 1× NEBuffer 3.1 (100 mM NaCl, 50 mM Tris-HCl, 10 mM MgCl<sub>2</sub>, 100 µg/ml BSA, pH 7.9@25 °C) was first incubated at 55 °C for 15-20 min. Afterwards, 5 µL of each resultant were loaded onto 15% non-denaturing polyacrylamide gel and subjected to 150 V constant voltage in 0.5× TBE buffer (45 mM Tris, 45 mM borate, 1 mM EDTA, pH 8.3) for 60 min. The gel was then stained by 1 × SYBR Green I and analyzed on a Maestro Ex IN-VIVO Imaging System (CRI).

**Sensing of Avidin in Human Serum.** In order to demonstrate the utility of SER-EXPAR in complex biological matrix, it was performed in the presence of human serum. The serum was used, without dilution or other pretreatment,

to dilute target protein (avidin) by tenfold in the series. Subsequently, 2.5  $\mu$ L of spiked serum was introduced into SER-EXPAR system and subjected to the same procedure as described above. The results were compared with those obtained in buffer.

**Table S1. Sequences of the Oligonucleotides.<sup>[a]</sup>**

| Name             | Sequence (5'-3')                                                                   |
|------------------|------------------------------------------------------------------------------------|
| EXPAR template   | CTCACGCTACGGAC <u>GACTC</u> CTCTCACGCTAC                                           |
| EBH <sub>1</sub> | CATCACTGCAC <u>TGACTC</u> ACGTTTTTCGT <u>GAGTC</u> AACTCCTGTAAG                    |
| EBH <sub>2</sub> | CATCACTGCAC <u>TGACTC</u> ACGTTTTTCGT <u>GAGTC</u> AACT                            |
| EBH <sub>3</sub> | CACT <u>GACTC</u> ACGTTTTTCGT <u>GAGTC</u> AACTCCTGTAAG                            |
| EBH <sub>4</sub> | CACT <u>GACTC</u> ACGTTTTTCGT <u>GAGTC</u> AACT                                    |
| EBH <sub>5</sub> | CATCACTGCAC <u>TGACTC</u> ACGTTTTTCGT <u>GAG</u> (biotin-T) <u>CA</u> AACTCCTGTAAG |
| EBH <sub>6</sub> | CATCACTGCAC <u>TGACTC</u> ACGTTTTTCG (biotin-T) <u>GAGTC</u> AACTCCTGTAAG          |
| EBH <sub>7</sub> | CATCACTGCAC <u>TGACTC</u> ACGTTTT (biotin-T) <u>CGT</u> <u>GAGTC</u> AACTCCTGTAAG  |

<sup>[a]</sup>The underlined bases represent the basic sequences of hairpin probes' stem-loop structure, among which the red bases are the recognition sites of Nt.BstNBI.

**Table S2. Comparison of different methods based on small molecule-linked DNA for the detection of avidin.**

| Method                                    | Detection limit | Detection range | Time      | Complexity                          | Ref. |
|-------------------------------------------|-----------------|-----------------|-----------|-------------------------------------|------|
| Small molecule-linked loop DNA probe      | 0.4 nM          | 0 nM~200 nM     | ~30 min   | Multi-steps                         | 1    |
| Modular, DNA-Based Beacon                 | low nanomolar   | 1 nM~10 nM      | 10 min    | One-step, need surface modification | 2    |
| Fluorescent copper nanoparticles          | 0.1 nM          | 0.5 nM~100 nM   | >1.5 h    | Multi-steps                         | 3    |
| Sterically and allosterically tunable HCR | 1.07 nM         | 4 nM~1 $\mu$ M  | 3 h       | Multi-steps                         | 4    |
| Strand displacement competition reaction  | nanomolar       | 0 nM~2 nM       | overnight | One-step                            | 5    |
| This work                                 | 1.29 nM         | 5 nM~50 nM      | 20-25 min | One-step                            | /    |

**References:**

- 1 X. X. Chen, C. S. Lin, Y. Y. Chen, F. Luo, Y. R. Wang and X. Chen, *Biosens. Bioelectron.*, 2016, **83**, 97-101.
- 2 S. Ranallo, M. Rossetti, K. W. Plaxco, A. Vallée-Bélisle and F. Ricci, *Angew. Chem. Int. Ed.*, 2015, **54**, 13214-13218
- 3 H. B. Wang, H. D. Zhang, Y. Chen and Y. M. Liu, *Biosens. Bioelectron.*, 2015, **74**, 581-586.
- 4 F. F. Ban, H. Shi, C. Feng, X. X. Mao, Y. M. Yin and X. L. Zhu, *Biosens. Bioelectron.*, 2016, **86**, 219-224.
- 5 Z. Zhang, C. Hejesen, M. B. Kjelstrup, V. Birkedal and K. V. Gothelf, *J. Am. Chem. Soc.*, 2014, **136**, 11115-11120

## Supplement Figures

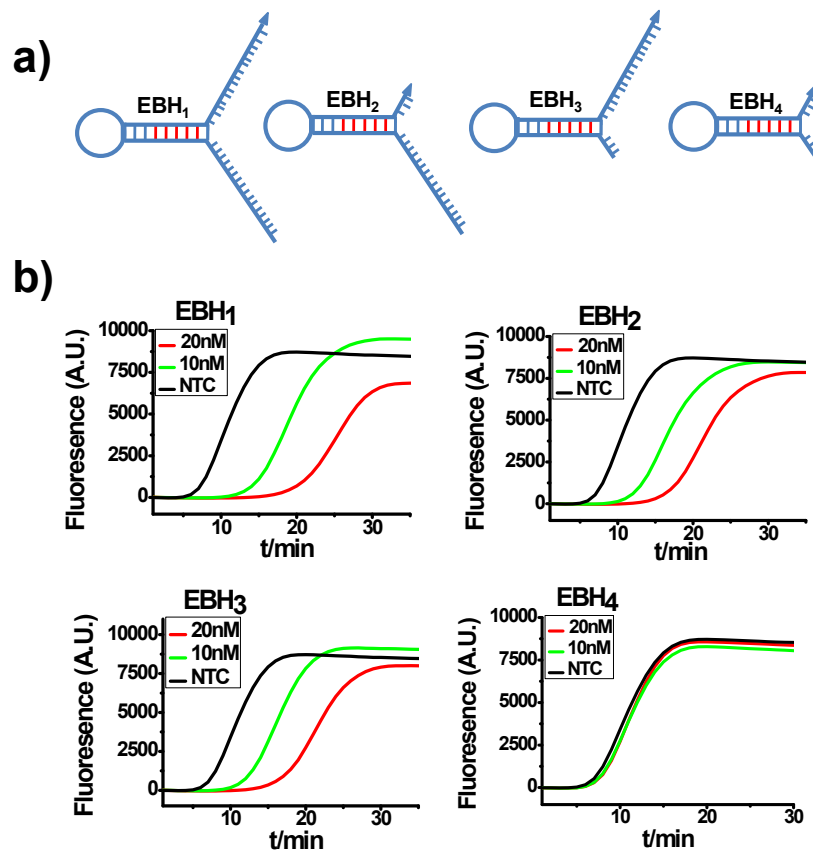

**Figure S1.** (a) Four kinds of EBH with different side arm length. (b) Effects of 10nM and 20nM EBH<sub>1</sub>~EBH<sub>4</sub> on the real-time fluorescence of EXPAR; NTC represents no-EBH control.

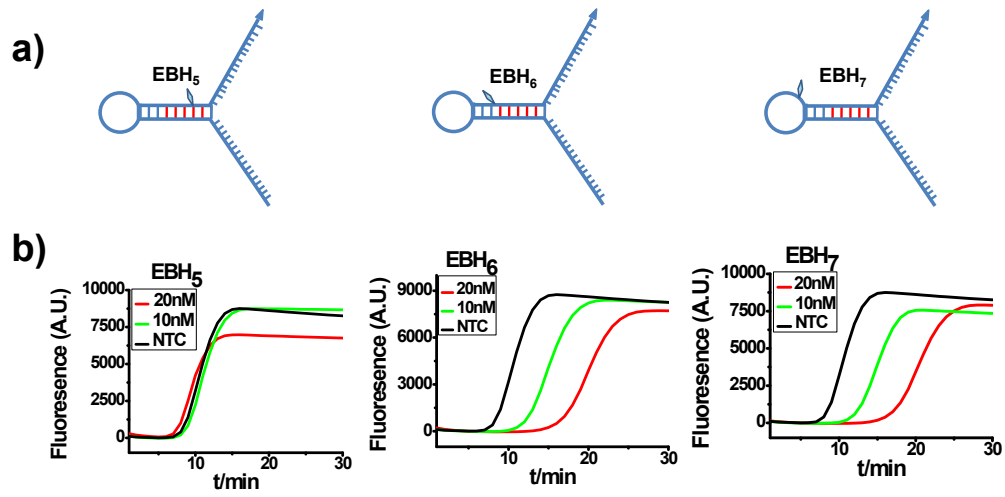

**Figure S2.** (a) Three kinds of EBH labeled with biotin at different sites, *i.e.*, among, near and relatively far from the recognition sequence of Nt.BstNBI. (b) Effects of 10nM and 20nM EBH<sub>5</sub>~EBH<sub>7</sub> on the real-time fluorescence of EXPAR; NTC represents no-EBH control.

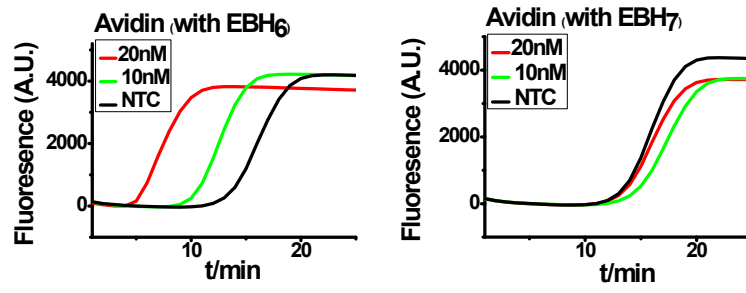

**Figure S3.** Real-time fluorescence curves caused by 10nM and 20nM avidin in the presence of 20nM EBH<sub>6</sub> (Left) and EBH<sub>7</sub> (Right); NTC represents no-avidin control.

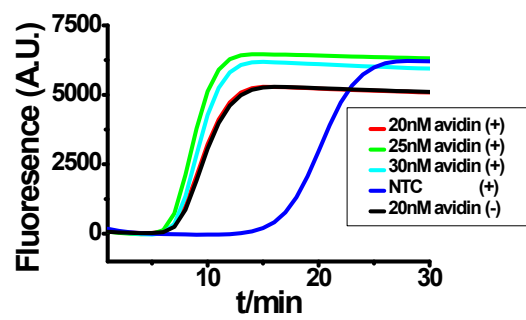

**Figure S4.** Real-time fluorescence curves caused by 20nM, 25nM and 30nM avidin; NTC represents no-avidin control; "+" represents that the system is in the presence of 20nM EBH<sub>6</sub> and "-" represents that the system is in the absence of EBH<sub>6</sub>.

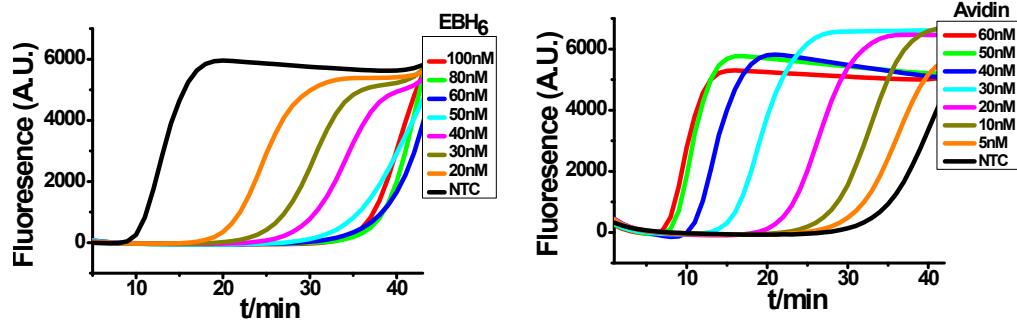

**Figure S5.** (a) Real-time fluorescence curves caused by various concentrations of EBH<sub>6</sub> without avidin; NTC represents no-EBH<sub>6</sub> control. (b) Real-time fluorescence curves caused by various concentrations of avidin in the presence of 50nM EBH<sub>6</sub>; NTC represents no-avidin control.



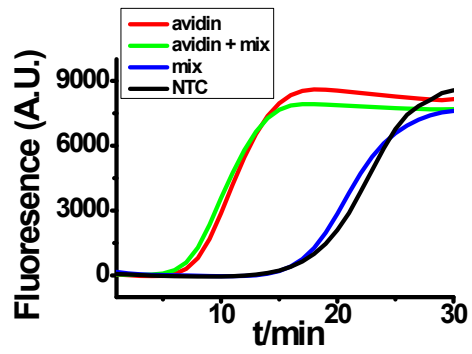

**Figure S6.** Real-time fluorescence curves caused by 20 nM avidin and the protein mixture in the presence of 20 nM EBH<sub>6</sub>. Mix represents the mixture of 200 nM IgG, 200 nM thrombin and 200 nM elastase. NTC represents no-protein control. (Overmuch proteins (*i.e.* 3\*500 nM) in the buffer would influence the rate of EXPAR, thus the total amount of proteins in the mix was set 3\*200 nM that had little effect on the EXPAR).
